# Supplementary material
Source: PubMed Central journal article supplement (PMC2934795)
Supplement: 091883_2.pdf [file 091883_2.pdf]

**APPENDIX 2** (as supplied by the authors): GEE Analysis to assess factors associated with permanent colostomy

| Explanatory variable                    | Odds Ratio | 95% CI      | <i>P</i> value |
|-----------------------------------------|------------|-------------|----------------|
| Experimental group                      | 0.70       | 0.38 – 1.30 | 0.26           |
| Male                                    | 1.46       | 1.07 – 1.98 | 0.02           |
| Age, 10y                                | 1.31       | 1.13 – 1.52 | < 0.001        |
| Co-morbidities                          |            |             |                |
| ≥2                                      | 2.06       | 1.17 – 3.61 | 0.01           |
| 1                                       | 1.08       | 0.65 – 1.79 | 0.77           |
| Tumour size, cm                         | 1.12       | 0.99 – 1.28 | 0.08           |
| TNM stage                               |            |             |                |
| Stage 4                                 | 1.52       | 0.87 – 2.67 | 0.14           |
| Stage 3                                 | 0.93       | 0.58 – 1.50 | 0.77           |
| Stage 2                                 | 1.16       | 0.77 – 1.77 | 0.47           |
| Histologic grade                        |            |             |                |
| Well                                    | 0.76       | 0.35 – 1.62 | 0.47           |
| Moderate                                | 0.78       | 0.45 – 1.36 | 0.38           |
| Vascular, lymphatic, or neural invasion | 1.17       | 0.74 – 1.83 | 0.49           |
| Distance of tumour from anal verge, cm  | 0.72       | 0.98 – 0.76 | < 0.001        |
| Positive circumferential radial margin  | 3.00       | 1.57 – 5.72 | < 0.001        |
| Preoperative use of radiation           | 1.83       | 1.27 – 2.64 | < 0.01         |

GEE model with multiple imputation (10 sets), considered clustering of data at hospital level. Mean ICC across 10 models = 0.0328.

Reference comparisons were control group, female sex, no comorbidities, TNM Stage 1, poor tumour differentiation, no vascular, lymphatic, or neural invasion, negative circumferential radial margin, and no preoperative use of radiation. Odds ratios for age, tumour size, and distance of tumour from anal verge are for 10-year increases, 1 cm increases, and 1 cm increases, respectively.
