# Supplementary material
Source: PubMed Central journal article supplement (PMC2934795)
Supplement: 091883_3.pdf [file 091883_3.pdf]

**APPENDIX 3** (as supplied by the authors): In the experimental arm: Patient, tumour, and process of care characteristics and outcomes for cases with and without an operative demonstration

|                                              | Cases with operative demonstration | Cases without operative demonstration | <i>P</i> value |
|----------------------------------------------|------------------------------------|---------------------------------------|----------------|
| Number of patients                           | 69                                 | 489                                   |                |
| <b>Patient characteristics</b>               |                                    |                                       |                |
| Age, Median (years)                          | 69                                 | 69                                    | 0.65           |
| Male                                         | 42 (60.9)                          | 297 (60.7)                            | 0.98           |
| Co-morbidities                               |                                    |                                       |                |
| 0                                            | 53 (76.8)                          | 357 (73.0)                            | 0.78           |
| 1                                            | 12 (17.4)                          | 102 (20.9)                            |                |
| ≥ 2                                          | 4 (5.8)                            | 30 (6.1)                              |                |
| <b>Tumour characteristics</b>                |                                    |                                       |                |
| TNM stage                                    |                                    |                                       |                |
| Stage 1                                      | 20 (29.0)                          | 114 (23.3)                            | 0.63           |
| Stage 2                                      | 15 (21.7)                          | 113 (23.1)                            |                |
| Stage 3                                      | 26 (37.7)                          | 179 (36.6)                            |                |
| Stage 4                                      | 4 (5.8)                            | 55 (11.2)                             |                |
| Unable to stage                              | 4 (5.8)                            | 28 (5.7)                              |                |
| Distance tumour from anal verge, Median (cm) | 6.0                                | 10.0                                  | <0.001         |
| <b>Process of care characteristics</b>       |                                    |                                       |                |
| Number of lymph nodes examined, Median       | 9                                  | 10                                    | 0.07           |
| Positive circumferential radial margin*      | 5 (7.2)                            | 36 (7.4)                              | 0.97           |
| Preoperative radiation                       | 16 (23.2)                          | 71 (14.5)                             | 0.06           |
| Post operative radiation                     | 17 (24.6)                          | 94 (19.2)                             | 0.29           |

*Table continued on next page*

|                                        | Cases with operative demonstration | Cases without operative demonstration | <i>P</i> value |
|----------------------------------------|------------------------------------|---------------------------------------|----------------|
| <b>Outcomes</b>                        |                                    |                                       |                |
| Procedure at initial surgery           |                                    |                                       |                |
| Permanent colostomy                    | 15 (21.7)                          | 131 (26.8)                            | 0.06           |
| Hartmann's resection                   | 0 (0.0)                            | 20 (4.1)                              |                |
| Low anterior resection with ileostomy  | 19 (27.5)                          | 82 (16.8)                             |                |
| Low anterior resection                 | 35 (50.7)                          | 256 (52.4)                            |                |
| Primary outcome - permanent colostomy  | 24 (34.8)                          | 194 (39.7)                            | 0.44           |
| Primary outcome - any local recurrence | 5 (7.2)                            | 31 (6.3)                              | 0.77           |

\* Positive circumferential radial margin = distance  $\leq$  1mm
