# Supplementary material
Source: PubMed Central journal article supplement (PMC2934795)

**APPENDIX 1** (as supplied by the authors): QIRC Trial – Time to local recurrence

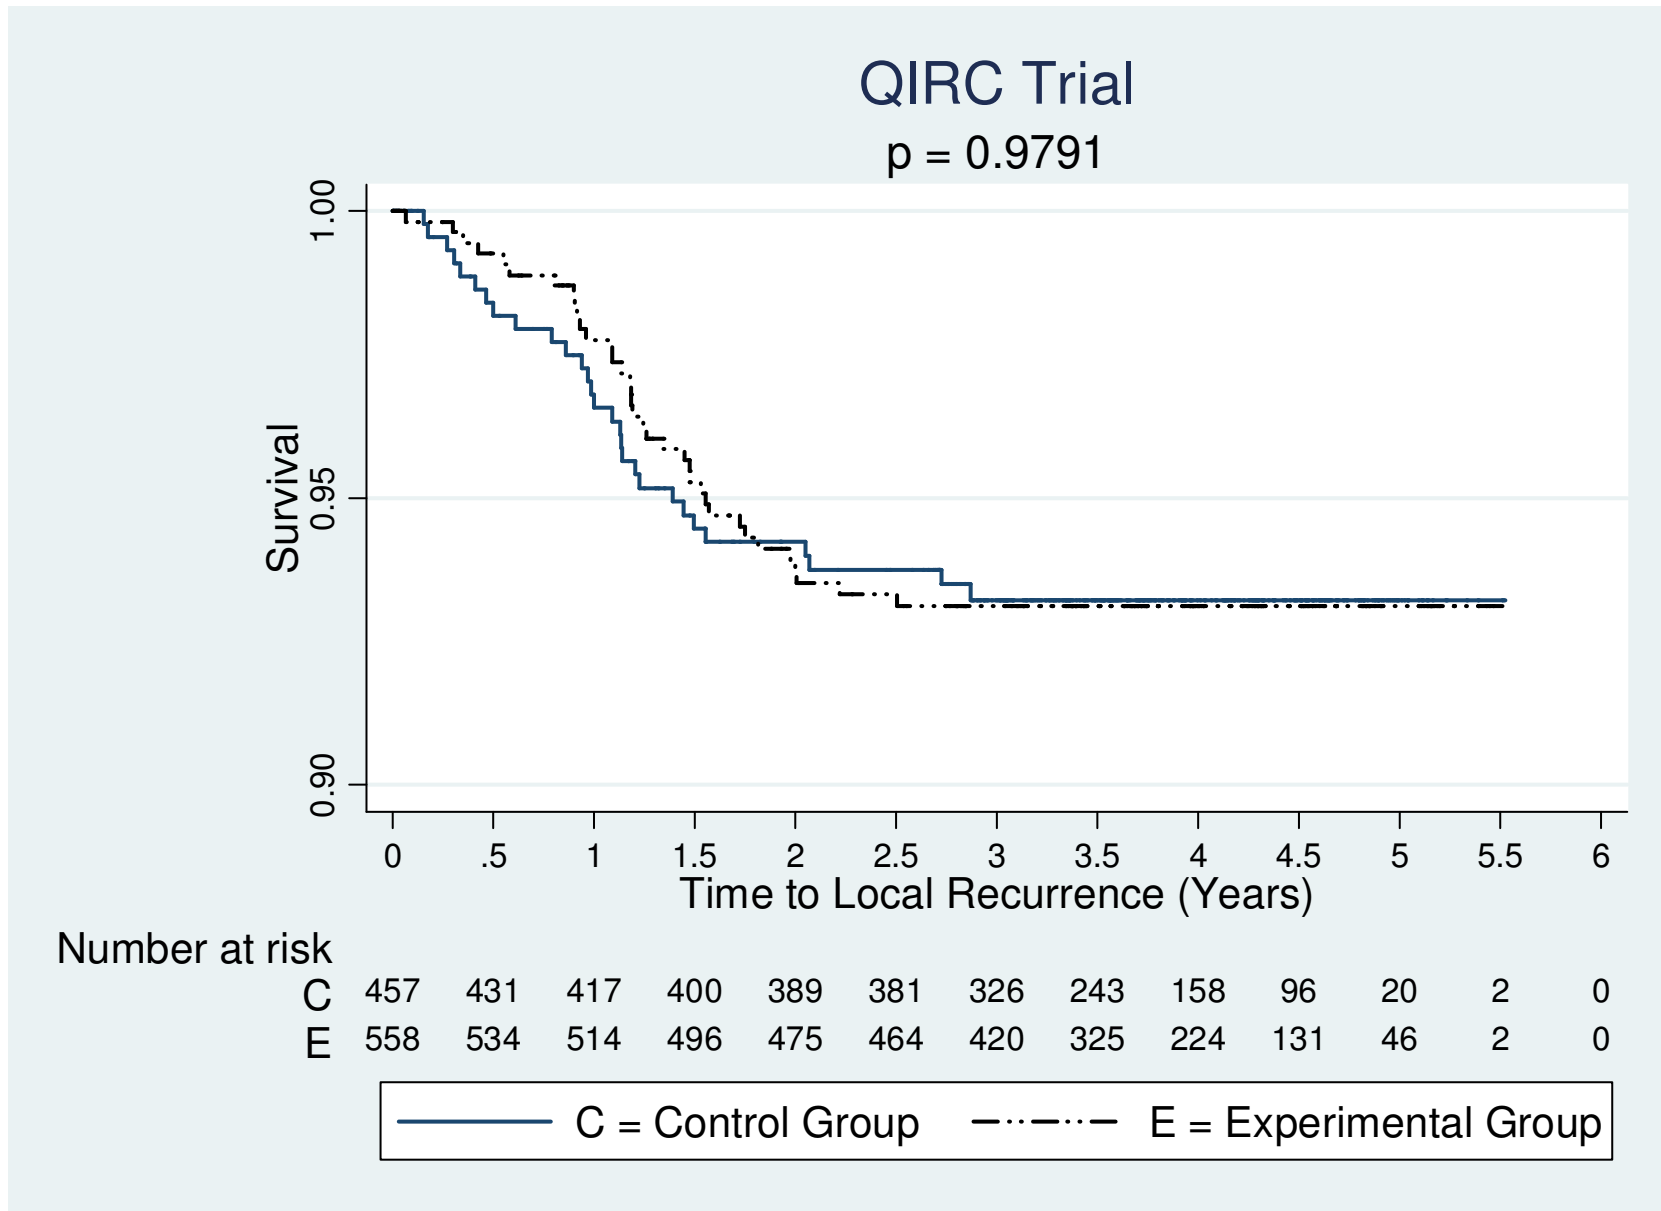

Supplement: 091883_1.pdf [file 091883_1.pdf]
